# Supplementary material
Source: PubMed Central journal article supplement (PMC3631680)
Supplement: 1219462110_pnas.201219462SI.pdf [file 1219462110_pnas.201219462SI.pdf]

# Supporting Information

Chiang et al. 10.1073/pnas.1219462110

## SI Materials and Methods

**Mice and Reagents.** All mice were maintained under specific pathogen-free conditions in the animal facility of the Institute of Cellular and Organismic Biology at Academia Sinica, and the experimental protocol was approved by Academia Sinica's Institutional Animal Care and Utilization Committee. Mice were genotyped with genomic PCR using primers described previously (1). A primer set specific for P-selectin (*Selp*; 5'-TTGTAAATCAGAAGGAAGTGG-3' and 5'-CGAGTTACTCTTGATGTAGATCTCC-3') was used for normalization. C57BL/6 mice were purchased from the Laboratory Animal Center in Taiwan and used at 6–10 wk of age. 293T and NIH 3T3 cells were cultured in DMEM (Invitrogen) supplemented with 10% (vol/vol) FBS and 100 U/mL penicillin/streptomycin.

**Antibodies for Flow Cytometry Analysis.** The following antibodies were used for flow cytometry analysis in this study: FITC- or allophycocyanin (APC)-conjugated anti-mouse Gr-1 (clone RB6-8C5; eBioscience), phycoerythrin (PE)-conjugated anti-mouse Mac-1 (clone M1/70; BD Pharmingen), FITC-conjugated anti-mouse CD4 (clone RM4-5; BD Pharmingen), APC-Cy7-conjugated anti-mouse CD8 (clone 53-6.7; BD Pharmingen), APC-conjugated anti-mouse CD44 (clone IM7; BD Pharmingen), PE-conjugated anti-mouse CD62L (clone MEL-14; BD Pharmingen), APC-conjugated anti-mouse CD138 (clone 281-2; BD Pharmingen), PE-conjugated anti-mouse B220 (clone RA3-6B2; BD Pharmingen), and APC-conjugated CD3 (clone 145-2C11; BD Pharmingen).

**Isolation of Immune Cells.** Spleen and bone marrow cells were isolated from control (Ctrl) and conditional knockout (CKO) mice. Cells were stained with antibodies specific for CD3, B220, Gr-1, and Mac-1 as described above and separated using a FACSAria II cell sorter (BD Biosciences).

**Isolation and Culture of Primary Keratinocytes.** For culture of mouse primary keratinocytes, mice were killed, and tail skin was peeled off of tail cartilage, followed by overnight incubation in 2.5 mg/mL dispase II (Roche) at 4 °C. The epidermis was then separated from the dermis using forceps and further digested into single suspended keratinocytes with TrypLE (Invitrogen). The keratinocytes were washed with PBS and passed through a 70- $\mu$ m mesh to remove debris before use. Freshly isolated keratinocytes were cultured in Progenitor Cell Targeted Medium (CELLnTEC) in collagen-coated 24-well plates at a density of  $0.4 \times 10^6$  cells in 0.4 mL/well. In some cases, cultured keratinocytes were treated with LPS (5  $\mu$ g/mL; Sigma-Aldrich) or TNF- $\alpha$  (50 ng/mL; PeproTech) for 24 h. In some cases, PR domain containing 1, with ZNF domain (*Prdm1*) was deleted in vitro by adding 50 nM 4-hydroxytamoxifen (4OHT) or the solvent control, ethanol (EtOH). Human keratinocytes were cultured as described previously (2). For stimulation of human keratinocytes, cells were cultured without feeder cells in collagen-coated plates in Progenitor Cell Targeted Medium.

**Plasmids.** The Blimp-1 expression vector has been described previously (3). HA-tagged FBJ osteosarcoma oncogene (c-Fos) and fos-related antigen 1 (Fra-1) cDNA was cloned into the pcDNA expression vector. For construction of the luciferase reporter, the colony stimulating factor 3 (*Csf3*) promoter region from -3,886 to +20 relative to the transcriptional start site was amplified from tail genomic DNA of C57BL/6 mice by PCR and then cloned into the pGL3B vector (Promega). The activator protein 1 (AP-1)-binding site located in the -652 to -646 region of the *Csf3*

promoter was mutated by site-directed mutagenesis. Details of cloning procedures are available on request. The *Renilla* luciferase reporter driven by the *thymidine kinase* (*tk*) promoter (pRL-TK) has been described previously (3).

**RNA Isolation and Quantitative RT-PCR.** Total RNAs were isolated on an RNeasy spin column (Qiagen), and 250 ng of total RNAs were used for cDNA synthesis with a High-Capacity cDNA Reverse-Transcriptase Kit (Applied Biosystems) according to the manufacturer's instructions. Quantitative RT-PCR (qRT-PCR) analysis of the cDNA was carried out using the TaqMan primer sets or primers for the SYBR Green method on an ABI Prism 7300 sequence detection system (Applied Biosystems) as reported previously (3). The deletion efficiency of *Prdm1* transcripts was determined using the Taqman primer set (ID\_MA00197285\_A1; Applied Biosystems) and the internal control *Mrp32* primer set (ID\_MA00777741\_SH; Applied Biosystems). Mouse *Prdm1* transcript levels were measured using the Taqman primer set as described previously (4). The following primer sets were used in the SYBR Green method: *Prdm1*, 5'-CGAAATGCCCTTC-TACCCTG-3' and 5'-GCGTTCAAGTAAGCGTAGGAGT-3'; thymic stromal lymphopoietin (*Tslp*), 5'-GACTGTGAGAGC-AAGCCAGCT-3' and 5'-CTCCGGCAAATGTTTTGTC-3'; S100 calcium binding protein A8 (*S100a8*), 5'-GAAATCACCATGCCCTCTACAAG-3' and 5'-TTTATCACCATCGCAAG-GAACTC-3'; S100 calcium binding protein A9 (*S100a9*), 5'-GGAGCGCAGCATAACCACCATC-3' and 5'-GCCATCAGC-ATCATACTACTCCTCA-3'; *Csf3*, 5'-GAGCAGTTGTGTGC-CACCTACA-3' and 5'-CCAGAGAGTGGCCCAGCA-3'; C-C chemokine ligand 2 (*Ccl2*), 5'-GGCTCAGCCAGATGCAGT-TAAC-3' and 5'-CCTACTCATTGGGATCATCTTGCT-3'; C-X-C chemokine ligand 1 (*Cxcl1*), 5'-GCAGACCATGGCTGG-GATT-3' and 5'-TGTCAGAAGCCAGCGTTCAC-3'; vascular endothelial growth factor a (*Vegfa*), 5'-GAGCAGAAGTCCCA-TGAAGTGAT-3' and 5'-CTGCTGTGCTGTAGGAAGCTC-AT-3'; *Il1a*, 5'-TGGCCAAAGTTCTGACTTGT-3' and 5'-AT-GAAGTGAGCCATAGCTTGCA-3'; *Il1b*, 5'-AGTTGACGGACCCCAAAGAT-3' and 5'-GTGCAGTTGTCTAATGGGAA-CGT-3'; *Tnf*, 5'-GACCCTCACACTCAGATCATCTTCT-3' and 5'-CCTCCACTTGGTGGTTTTGCT-3'; *Cxcl2*, 5'-ACTGCGCC-CAGACAGAAGTC-3' and 5'-CAGTTAGCCTTGCCCTTTGT-TCAG-3'; *Cxcl5*, 5'-ATCTAGCTGAAGCTGCCCTTC-3' and 5'-GGGATCACCTCCAAATTAGCG-3'; *Il24*, 5'-CAGCCCA-GTAAGGACAATTCCA-3' and 5'-GCGACTTCTGTATCCA-ACTGTTTG-3'; FBJ osteosarcoma oncogene (*Fos*), 5'-ATCG-GCAGAAGGGGCAAAGTAG-3' and 5'-GCAACGCAGACT-TCTCATCTTCAAG-3'; FBJ osteosarcoma oncogene b (*Fosb*), 5'-CTCCTCCTGGACGAATTGA-3' and 5'-CAGTCAGATA-GGGGTTACATT-3'; *Jun*, 5'-CAGAGAGGAAGCGCATGA-GG-3' and 5'-TTCCTTTTCCGGCACTTGG-3'; *Junb*, 5'-TCA-CCGAGGAGCAGGAGG-3' and 5'-GGTCGTCCAGGGCTT-TGA-3'; fos-like antigen 1 (*Fosl1*), 5'-GATGGTGCAGCCTC-ATTTC-3' and 5'-CCCGATTCTCATCTCCAAT-3'; *Fosl2*, 5'-CCCACAATCAACGCCATCA-3' and 5'-CCTCAGGAGA-CAGCTGCTCAT-3'; activating transcription factor 2 (*Atf2*), 5'-CTGGCAGGACCATGAATTAGTG-3' and 5'-CCTCTGTTT-CATGGCAAAGACA-3'; *Jund*, 5'-CACACATCACGCCACA-GAAGT-3' and 5'-TGTCCTACCCTGCTGTTTCTT-3'; and actin, beta (*Actb*), 5'-GCTGTATTCCCTCCATCGTG-3' and 5'-CACGGTTGGCCTTAGGGTTTCAG-3'.

**Immunoblot Analysis.** Keratinocytes from Ctrl and CKO mice were isolated and cultured in CnT-07 Medium (CELLnTEC). Cells were washed before lysing with lysis buffer [0.5% (wt/vol) Triton X-100, 20 mM Hepes (pH 7.9), 300 mM NaCl, 1 mM EDTA, 1 mM EGTA, and protease inhibitor mixture (Roche)]. Immunoblotting was performed essentially as described previously (4), using anti-Blimp-1 (1:250) (5), anti-c-Fos (1:200; Abcam), and anti-Fra-1 (1:400; Santa Cruz Biotechnology). Antibodies specific to  $\beta$ -actin (Sigma-Aldrich) or tubulin (Thermo Scientific) were used as loading controls.

**Histology, Immunofluorescence, and Immunocytochemical and Immunohistochemistry Staining.** To prepare frozen sections, freshly isolated skin samples were embedded in optimal cutting temperature compound and immediately immersed in liquid nitrogen. Cryosections (5  $\mu$ m) were cut and fixed with acetone for further immunofluorescence staining. Adjacent sections were stained with primary antibodies, including anti-Blimp-1 (5), anti-Gr-1 (clone RB6-8C5; eBioscience), anti-K1 (clone PRB149P; Covance), anti-K5 (clone PRB-160P; Abcam), anti-loricrin (rabbit polyclone; Abcam) and anti-Ki67 (clone TEC-3; Dako) for immunohistochemistry (IHC) staining and Alexa Fluor 488-conjugated anti-mouse CD4 (clone RM4-5; Biogen), anti-mouse F4/80 (clone BM8; eBioscience), and PE-conjugated anti-rat IgG (Invitrogen) for immunofluorescence staining. IHC staining was done using secondary antibodies conjugated to HRP or alkaline phosphatase, and the color was developed using tetramethylbenzidine or nitro blue tetrazolium/5-bromo-4-chloro-3-indolyl phosphate substrates. Some sections were further counterstained with hematoxylin. For immunofluorescence staining, images were acquired under a fluorescence microscope (Leica DM6000B).

**2,4-Dinitrofluorobenzene-Induced Contact Dermatitis (Contact Hypersensitivity) and Tape-Stripping Test.** Mice injected with 4OHT for 2 mo were used for induction of contact dermatitis. In brief, abdominal skin of Ctrl and CKO mice was shaved and sensitized with 20  $\mu$ L 0.5% (wt/vol) 2,4-dinitrofluorobenzene (DNFB) in acetone/olive oil (4:1). After 5 d, each side of the ear was challenged with either 0.2% DNFB or solvent for 24 h. Ear inflammation was determined by increases in ear thickness after challenge and H&E staining. Ear thickness was measured with a micrometer (Mitutoyo) before and after challenge. The ears were then removed for pathological examination with H&E staining. For tape-stripping test, skin of Ctrl and CKO mice in dorsal area was shaved and stripped for 10 strokes using transparent tape as described previously (6). Two days later, mice were killed, and skin was removed for pathological examination with H&E staining.

**Blood Leukocyte Count, Multiplex Array, and ELISA.** Peripheral blood samples were collected from Ctrl and CKO mice using EDTA as an anticoagulant. Blood samples were diluted in cell pack buffer, and the numbers of leukocytes were determined with an automated hematology analyzer (XT-1800i; Sysmex). Luminex assays were performed following the manufacturer's procedures using the Mouse Ig Isotyping Kit and MILLIPLEX MAP Mouse Cytokine/Chemokine panel (Millipore). Luminex samples were analyzed with a Luminex 200 (Millipore). Serum levels of granulocyte colony-stimulating factor (G-CSF) were determined with an ELISA system (R&D Systems).

**Lentiviral Vector Preparation and Generation of Lentiviral Vector-Producing shRNA for Fos or Fos1** Lentiviral vectors were prepared as described previously (7). Viral supernatants were concentrated, and the viral titers were determined as described previously (7). Keratinocytes were transduced by lentiviral vectors at a multiplicity of infection of 5. For overexpression of Blimp-1-GFP, GFP cDNA was fused in C termini of Blimp-1 cDNA and ex-

pressed by a lentiviral vector as described previously (8). For knockdown of c-Fos and Fra-1, shRNAs specific for *Fos* and *Fos1* were cloned into a lentiviral vector essentially following a cloning strategy described in a previous report (9), with the following sequences: shFos#1, 5'-GGGAGCTGACAGATACACTCC-3'; shFos#2, 5'-GGGTGCACTACTTACACGTC-3'; shFos1#1, 5'-GGGATCCCCAAAGCTGCTCAC-3'; shFos1#2, 5'-GGGTCTTTGACACCCTTACC-3'.

**Microarrays.** Fully confluent primary keratinocytes in 24-well plates were harvested for microarray study according to the protocol provided by the manufacturer (3' IVT Express Kit; Affymetrix). The biotinylated cRNAs were hybridized to the GeneChip Mouse Expression Array 430A (Affymetrix). After staining, the array was scanned, and images were acquired with a GeneChip Scanner 3000 (Affymetrix). Data were analyzed with GeneSpring GX11 software (Agilent). The 12 most up-regulated and most down-regulated genes in CKO + EtOH mice were illustrated on a heat map using MultiExperiment Viewer, version 4.6.1, of the TM4 Microarray Software Suite. The microarray data from this study have been submitted to the National Center for Biotechnology Information's Gene Expression Omnibus database (identifier GSE34586).

**ChIP.** ChIP was performed essentially as described previously (3, 10). In brief,  $1 \times 10^7$  primary keratinocytes lentivirally transduced with Blimp-1-GFP or GFP-encoding vector were used per reaction, and 5  $\mu$ g of anti-Blimp-1 (3, 11) was used to precipitate the Blimp-1-chromatin complex. Immunoprecipitated chromatin samples were quantified by qRT-PCR using primers that specifically amplified fragments encompassing the Blimp-1-binding site or within 100 bp of the Blimp-1-binding site at each individual gene locus using the SYBR Green method on an ABI Prism 7300 system (Applied Biosystems). Data were normalized to GFP vector-transduced cells. The following primers were used in this study: *Csf3* site 1, 5'-ATGCACACAGACACACCTCACC-3' and 5'-AACAAAGGCCAAACCTGTGG-3'; *Csf3* site 2, 5'-GAGCTTTGCTTCCCTCTGTCTC-3' and 5'-AAGACCTTGAGCTGGAGGCTG-3'; *Csf3* site 3, 5'-CCAGGGCTATCGAGACAGAGAA-3' and 5'-GAGGACAGGCCAAGGGATTC-3'; *Csf3* sites 4, 5, and 6, 5'-AGGACCTGAGCTGGACAAAAGAG-3' and 5'-AGAGAGTGGCCCAGCAACAC-3'; *Csf3* sites 7 and 8, 5'-TTCTCTCCACTTCCGAGTTTTGT-3' and 5'-CAGGGCTCACTGATTTTTTGG-3'; *Cxcl1* site 1, 5'-CTCTTATCGGGCTCAAACCT-3' and 5'-ACAGCCATCCATTGGATGAAG-3'; *Cxcl1* site 2, 5'-TCTGGAGCACACAGCTCTTTCA-3' and 5'-CGGATACAGGGAGGTGAGCTTA-3'; *Cxcl1* sites 3 and 4, 5'-TTGCAGGGAAACACCTGTAC-3' and 5'-CTGAGTCTGTTGTGGAGCTCTAG-3'; *Cxcl1* site 5, 5'-CTCAAAACCCCTATGCAAATGG-3' and 5'-AGGGAAATCTCACTGCAAAAAG-3'; *Cxcl5* site 1, 5'-CGGCTGACCTGTCTTTTCTC-3' and 5'-ACTGGTCTTTGAGGATCTGATGTG-3'; *Cxcl5* site 2, 5'-AGGCAGTGGTTAGCCAGACTATG-3' and 5'-AGCGGCTTAGCCAATCTGTTAC-3'; *Cxcl5* site 3, 5'-CAATGCAAGGCCAGCTTAGG-3' and 5'-CGGCTGGCACTCTGGTAAATAG-3'; *Cxcl5* site 4, 5'-TGGATCCAGAAGCTCCTGTGA-3' and 5'-GCCCGCTGCAGACTAAGATA-3'; *Cxcl5* site 5, 5'-GAAACCATTGTCCCTGAGGCTT-3' and 5'-TCACAATTTCCGATAGTGTGACAG-3'; *Il24* sites 1, 2, and 3, 5'-CCCTGGGTATCCACACCTATT-3' and 5'-CTCCCAAATGCTGGGAT-TAAAG-3'; *Il24* site 4, 5'-CAGCAGTACCCACCAGCTAGGT-3' and 5'-GCCGAGTCAAGGGAAAAAGAA-3'; *Il24* sites 5 and 6, 5'-ACAGCCCTGTGTGTCAGTC-3' and 5'-CCATAGCAGGAAGCTAAGAAGCA-3'; *Il24* sites 7 and 8, 5'-TGAAGTATTTCTCCAGGGAAGCA-3' and 5'-TAAGCAAGGCTGGGAGAACTGT-3'; *Il24* sites 9 and 10, 5'-CAGGTGTGAGGAGATTGTGTGAA-3' and 5'-ACCTCGCTTTGTGCTTTTTGTGTC-3'; *Il24* sites 11 and 12, 5'-ATCAACAAGCATCCGGCTGTT-3' and 5'-GAAGGGAACGACTCCCATCAG-3'; *Il24* site 13, 5'-GCT-

TCAGTGGTCCGCTTCTTC-3' and 5'-TTGGCCAGAGTGGA-GAATGAC-3'; *Il24* site 14, 5'-AGTTTTACAGTCCCCGAT-GTC-3' and 5'-CATAAACGAGGCCACTTGAACAC-3'; *Il1b* site 1, 5'-AAGGCTCCCTTCTCTCTGATGA-3' and 5'-ACGACTT-AGCACAGGCCTTAGG-3'; *Il1b* site 2, 5'-GGCAAAAGAAG-GTCGCCTAGTA-3' and 5'-TCTGCAGCACTGAAGGAAAA-TA-3'; *Il1b* sites 3 and 4, 5'-CCACCCTTCAGTTTTGTGTGA-3' and 5'-GATGAGCCTATTAGGCCTCGAA-3'; *Il1b* site 5, 5'-C-CGTTCCCTTCACTCCTCAGAGA-3' and 5'-GTTGCCATAGC-TGCTTCAGACA-3'; *Il1b* sites 6 and 7, 5'-ACTCAGGAGG-CAGCTGTTTTCTC-3' and 5'-CGTCACCCAAGGCTGAAC-TA-3'; *Il1b* sites 8, 9, and 10, 5'-AGCCTACTGGGTCCTG-TGTT-3' and 5'-GGCAGTTATTGCATGTCCATCA-3'; *Il1b* site 11, 5'-ATCACCCCAACAGAAGTCGTA-3' and 5'-ACCCTT-TCACTGCATTCTCAA-3'; *FosI1* site 1, 5'-CCTGGAGGCTC-CTGAGAAAGAT-3' and 5'-GTGCCTGGATTGGTGTGCT-3'; *FosI1* site 2, 5'-CTTCGGTCTCCTGCCTTTATT-3' and 5'-ACCTCTGTTTCCGCATTTGT-3'; *FosI1* site 3, 5'-ACCCTG-TTTGTCAATAACCTTC-3' and 5'-GTTGGACTGTGCCA-

CCATCAC-3'; *FosI1* site 4, 5'-TCTGCAAGAAAAGGAAGGA-AAGG-3' and 5'-CCTGAATGCTGGGATTAATGC-3'; *FosI1* site 5, 5'-GGGAGGTAGAGGCAGAGGAATC-3' and 5'-CCT-CACAGATGGGCATACTTTCA-3'; *FosI1* sites 6 and 7, 5'-TG-CGTATGGAAGCTGAAAAGAA-3' and 5'-GTCACCCCGAG-GTACAAAAGC-3'.

**Transfection and Luciferase Reporter Assay.** Keratinocytes isolated from skin of neonatal mice were used in luciferase reporter assay, and transfection was performed using the nucleofection technique (Lonza AG) according to the manufacturer's suggestions. A total of  $3 \times 10^6$  primary keratinocytes were used in each transfection, and cultured in each well of 12-well plates. *Renilla* luciferase reporter driven by the *tk* promoter (pRL-TK) was used as the internal control in all reporter assays for normalization. After 24 or 48 h, cells were washed and subjected to measurement of luciferase activity with the Promega Dual-Luciferase Reporter Assay System. Fold repression was calculated as described previously (3).

1. Chan YH, et al. (2009) Absence of the transcriptional repressor Blimp-1 in hematopoietic lineages reveals its role in dendritic cell homeostatic development and function. *J Immunol* 183(11):7039–7046.
2. Linge C (2005) Establishment and maintenance of normal human keratinocyte cultures. *Methods Mol Med* 107:1–11.
3. Su ST, et al. (2009) Involvement of histone demethylase LSD1 in Blimp-1-mediated gene repression during plasma cell differentiation. *Mol Cell Biol* 29(6):1421–1431.
4. Lin KI, et al. (2006) Reishi polysaccharides induce immunoglobulin production through the TLR4/TLR2-mediated induction of transcription factor Blimp-1. *J Biol Chem* 281(34):24111–24123.
5. Chang DH, Cattoretti G, Calame KL (2002) The dynamic expression pattern of B lymphocyte-induced maturation protein-1 (Blimp-1) during mouse embryonic development. *Mech Dev* 117(1-2):305–309.
6. Saegusa J, et al. (2009) Galectin-3 is critical for the development of the allergic inflammatory response in a mouse model of atopic dermatitis. *Am J Pathol* 174(3): 922–931.
7. Lin KI, Calame K (2004) Introduction of genes into primary murine splenic B cells using retrovirus vectors. *Methods Mol Biol* 271:139–148.
8. Ying HY, et al. (2012) SUMOylation of Blimp-1 is critical for plasma cell differentiation. *EMBO Rep* 13(7):631–637.
9. Lin FR, Kuo HK, Ying HY, Yang FH, Lin KI (2007) Induction of apoptosis in plasma cells by B lymphocyte-induced maturation protein-1 knockdown. *Cancer Res* 67(24): 11914–11923.
10. Magnúsdóttir E, et al. (2007) Epidermal terminal differentiation depends on B lymphocyte-induced maturation protein-1. *Proc Natl Acad Sci USA* 104(38): 14988–14993.
11. Kuo TC, Calame KL (2004) B lymphocyte-induced maturation protein (Blimp)-1, IFN regulatory factor (IRF)-1, and IRF-2 can bind to the same regulatory sites. *J Immunol* 173(9):5556–5563.







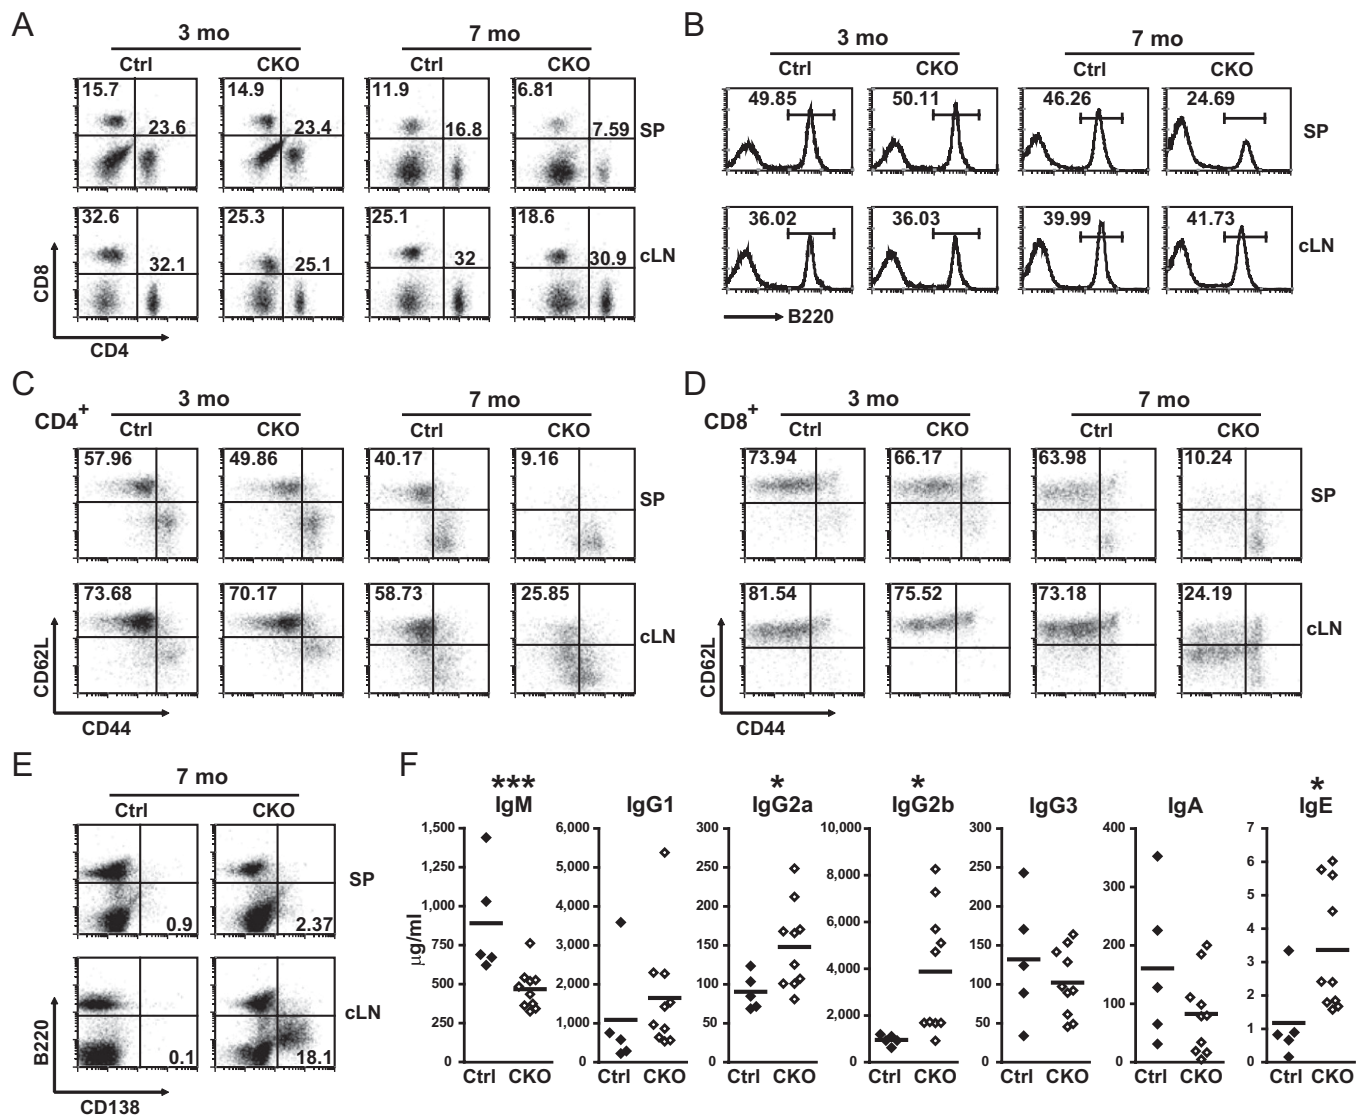

**Fig. 54.** CKO mice exhibit aberrant adaptive immune responses. (A–D) At 3 and 7 mo after 4OHT injection, splenocytes (SP) and cells of cervical lymph nodes (cLN) from Ctrl and CKO mice were isolated for flow cytometry analysis of the frequencies of the indicated immune cell markers. The percentages of CD4<sup>+</sup> and CD8<sup>+</sup> T cells (A) and B220<sup>+</sup> B cells (B) are shown in the quadrants. Dot plots show the frequencies of naïve and effector/memory CD4<sup>+</sup> (C) and CD8<sup>+</sup> (D) T cells. The percentage of naïve CD4<sup>+</sup> or CD8<sup>+</sup> T cells is indicated in each upper-left quadrant. (E) Dot plots showing the frequency of B220<sup>low</sup>-CD138<sup>+</sup> plasma cells from SPs and cLNs from Ctrl and CKO mice. Data are representative of at least three independent experiments from paired mice. (F) Levels of Ig subtypes in sera of Ctrl or CKO mice at 6 mo after 4OHT injection as analyzed with the Luminex assay. The mean in each group is designated by a horizontal line (Ctrl, *n* = 5; CKO, *n* = 6). \**P* < 0.05; \*\*\**P* < 0.005, comparing Ctrl and CKO groups.





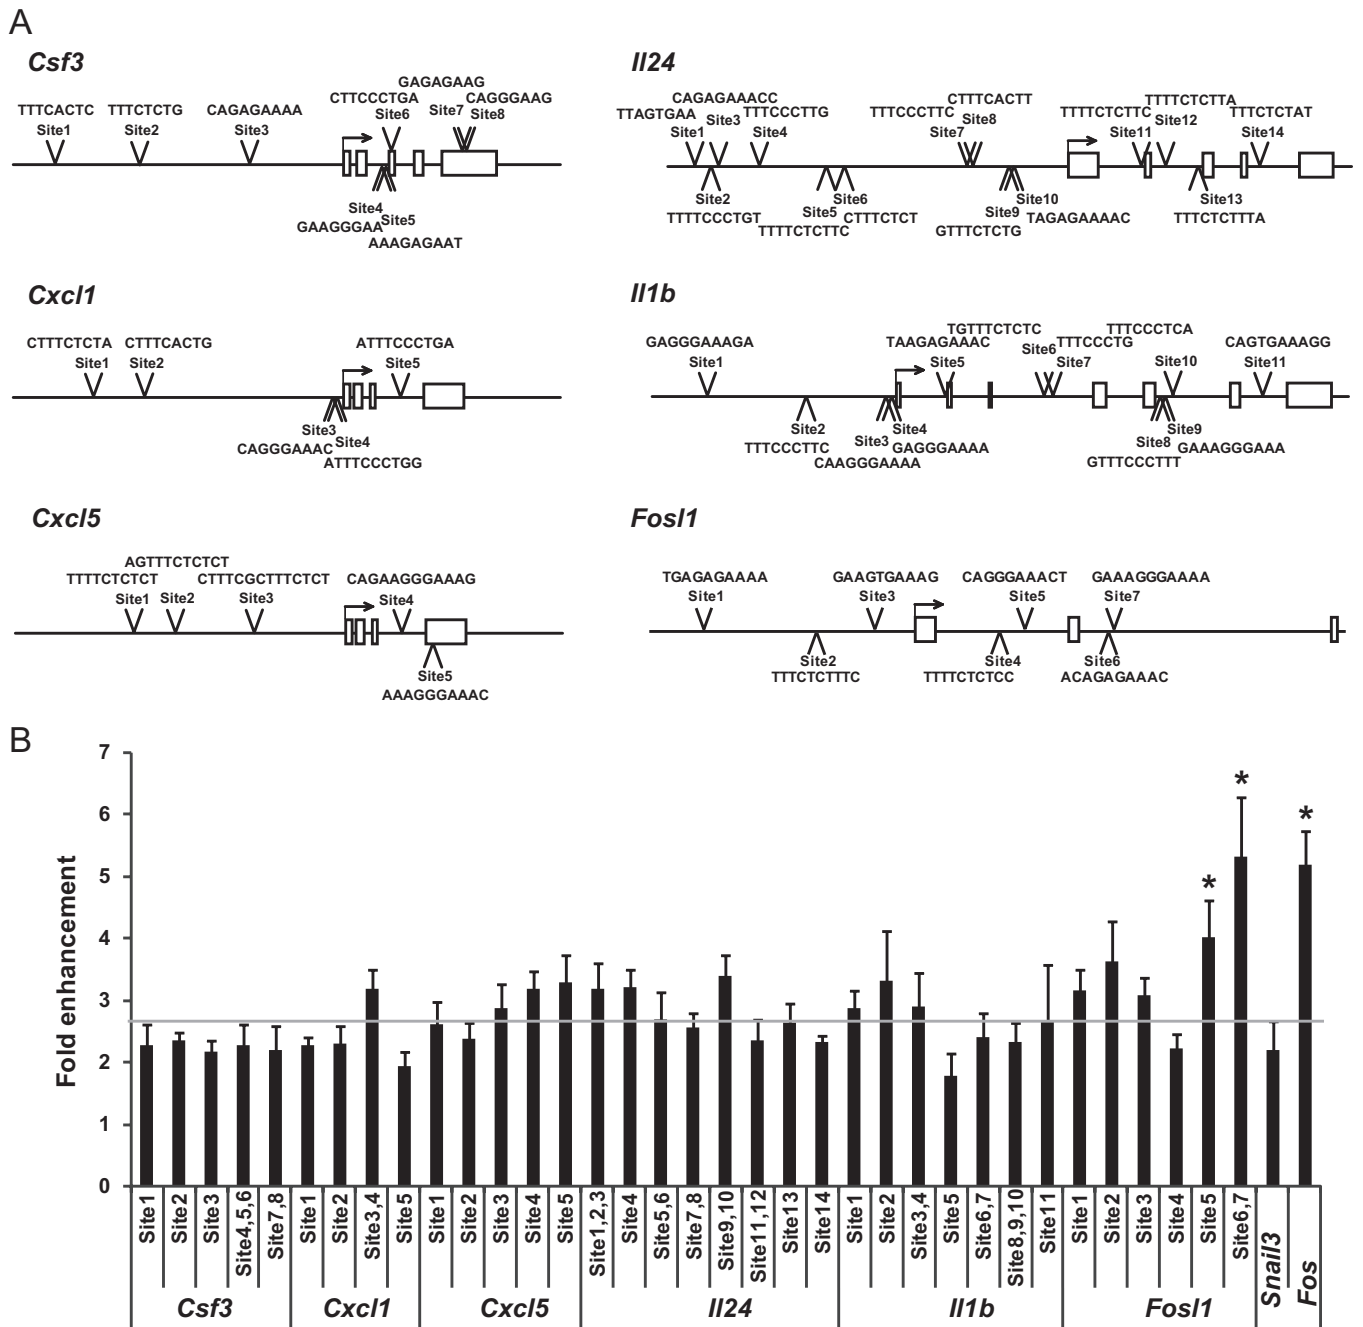

**Fig. 56.** ChIP of Blimp-1 binding at putative sites. (A) Putative Blimp-1-binding sites and sequences located between  $-5,000$  bp and  $+5,000$  bp of the transcriptional start site of the indicated genes. The arrow indicates the transcriptional start site, and open rectangles indicate exons. (B) Keratinocytes from neonatal mice were transduced with lentiviral vectors producing Blimp-1 fused with GFP (Blimp-1-GFP) or GFP alone. Binding of Blimp-1 to the putative Blimp-1-binding sites was analyzed with ChIP, followed by qPCR of immunoprecipitated DNA. Data represent the fold enhancement of gene loci in Blimp-1-GFP-expressing cells relative to that in GFP-expressing cells. *Snail3* served as the negative control locus. Data are mean  $\pm$  SEM ( $n = 5$ ). \* $P < 0.05$ .

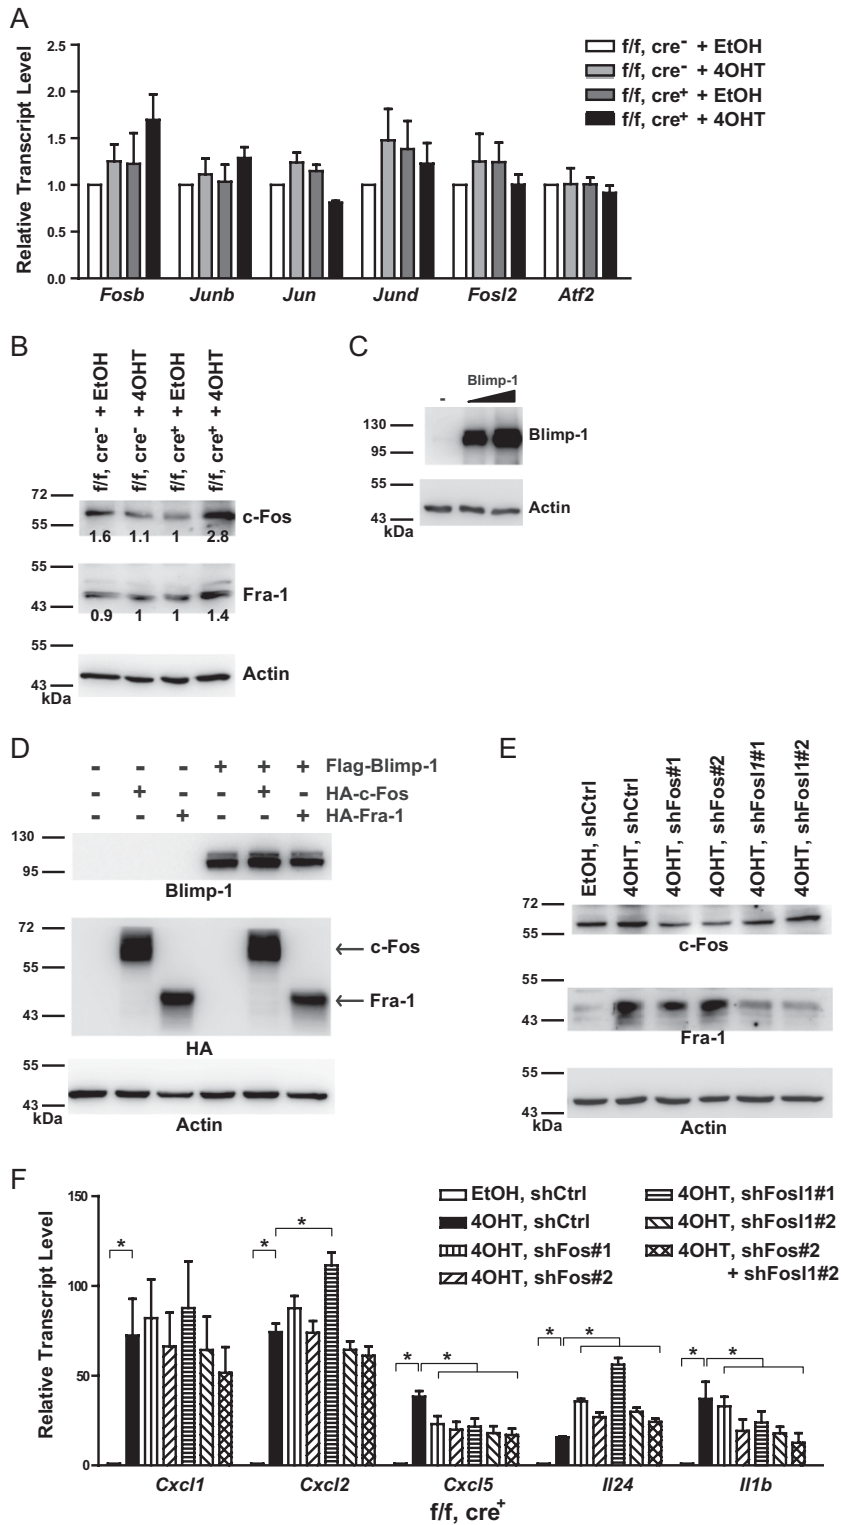

**Fig. S7.** Blimp-1 regulates *Fos* and *Fos1*. (A) qRT-PCR analysis of the indicated AP-1 family members using RNA prepared from the indicated keratinocytes treated with 50 nM 4OHT or EtOH. (B) Immunoblot analysis of c-Fos and Fra-1 using lysates prepared from the indicated keratinocytes treated with 4OHT or EtOH. Protein band intensity was quantified and normalized to the level of the internal control (actin) in each corresponding lane first and then further compared with the ratio obtained from the *f/f, Cre<sup>+</sup> + 4OHT* group. (C and D) Immunoblot analysis of the expression of Blimp-1 (C and D) and indicated HA-tagged AP-1 family proteins (D) in primary keratinocytes transfected with the indicated expression vectors for the luciferase reporter assay. Actin served as the loading control. (E) Immunoblot analysis of c-Fos and Fra-1 expression at 5 d after transduction of the indicated primary keratinocytes with lentiviral vectors producing shCtrl, two different shRNAs against Fos (shFos#1 and shFos#2), or two different shRNAs against Fos1 (shFos1#1 and shFos1#2). Actin served as the loading control. (F) qRT-PCR analysis of mRNA levels of the indicated cytokines/chemokines from *Prdm1*-intact or *Prdm1*-deleted keratinocytes transduced with lentiviral vectors producing shCtrl, shFos#1, shFos#2, shFos1#1, shFos1#2, or both shFos#2 and shFos1#2 (shF+F). Results are representative of two independent experiments performed in triplicate and represent mean  $\pm$  SEM.

**Table S1. Genes with more than twofold up-regulation in microarray analyses in comparing the *Prdm1<sup>ff</sup>*, *K5-CreER<sup>+</sup>* (f/f, Cre<sup>+</sup>) + 4OHT with *Prdm1<sup>ff</sup>*, *K5-CreER<sup>-</sup>* (f/f, Cre<sup>-</sup>) + EtOH groups**

| Up-regulated genes |                                                                         |                  | Fold (compared with f/f, Cre <sup>-</sup> + EtOH) |                              |                              |                              |
|--------------------|-------------------------------------------------------------------------|------------------|---------------------------------------------------|------------------------------|------------------------------|------------------------------|
| Gene symbol        | Gene name                                                               | Unigene (Avadis) | f/f, Cre <sup>-</sup> + EtOH                      | f/f, Cre <sup>-</sup> + 4OHT | f/f, Cre <sup>+</sup> + EtOH | f/f, Cre <sup>+</sup> + 4OHT |
| <i>Cxcl2</i>       | chemokine (C-X-C motif) ligand 2                                        | Mm.4979          | 1                                                 | 1.097                        | 1.420                        | 24.313                       |
| <i>Il24</i>        | interleukin 24                                                          | Mm.196691        | 1                                                 | 0.998                        | 0.785                        | 17.079                       |
| <i>Cxcl1</i>       | chemokine (C-X-C motif) ligand 1                                        | Mm.21013         | 1                                                 | 1.129                        | 1.485                        | 16.355                       |
| <i>Hmga2</i>       | high mobility group AT-hook 2                                           | Mm.157190        | 1                                                 | 0.774                        | 0.947                        | 15.988                       |
| <i>Cxcl5</i>       | chemokine (C-X-C motif) ligand 5                                        | Mm.4660          | 1                                                 | 1.633                        | 1.270                        | 12.242                       |
| <i>Fst</i>         | follistatin                                                             | Mm.4913          | 1                                                 | 0.581                        | 0.548                        | 11.168                       |
| <i>Mal</i>         | myelin and lymphocyte protein, T-cell differentiation protein           | Mm.39040         | 1                                                 | 0.761                        | 0.615                        | 10.872                       |
| <i>Dusp6</i>       | dual specificity phosphatase 6                                          | Mm.1791          | 1                                                 | 0.973                        | 1.245                        | 10.800                       |
| <i>Areg</i>        | amphiregulin                                                            | Mm.8039          | 1                                                 | 1.914                        | 1.830                        | 9.138                        |
| <i>Phlda1</i>      | pleckstrin homology-like domain, family A, member 1                     | Mm.3117          | 1                                                 | 1.080                        | 1.014                        | 9.086                        |
| <i>Cst6</i>        | cystatin E/M                                                            | Mm.36816         | 1                                                 | 2.583                        | 1.099                        | 8.669                        |
| <i>Fos</i>         | FBJ osteosarcoma oncogene                                               | Mm.246513        | 1                                                 | 1.189                        | 1.119                        | 6.334                        |
| <i>Klk6</i>        | kallikrein related-peptidase 6                                          | Mm.3944          | 1                                                 | 2.277                        | 1.647                        | 6.201                        |
| <i>Ptges</i>       | prostaglandin E synthase                                                | Mm.28768         | 1                                                 | 1.273                        | 1.054                        | 5.080                        |
| <i>Odc1</i>        | ornithine decarboxylase, structural 1                                   | Mm.34102         | 1                                                 | 0.792                        | 0.807                        | 4.309                        |
| <i>Nppb</i>        | natriuretic peptide precursor type B                                    | Mm.2740          | 1                                                 | 1.111                        | 1.302                        | 4.044                        |
| <i>Ctgf</i>        | connective tissue growth factor                                         | Mm.393058        | 1                                                 | 0.963                        | 0.830                        | 4.036                        |
| <i>Gyk</i>         | glycerol kinase                                                         | Mm.246682        | 1                                                 | 1.174                        | 1.072                        | 3.975                        |
| <i>Akr1c18</i>     | aldo-keto reductase family 1, member C18                                | Mm.41337         | 1                                                 | 1.544                        | 1.257                        | 3.962                        |
| <i>Tnfrsf25</i>    | tumor necrosis factor, alpha-induced protein 2                          | Mm.255332        | 1                                                 | 1.343                        | 0.772                        | 3.795                        |
| <i>Cryab</i>       | crystallin, alpha B                                                     | Mm.178           | 1                                                 | 1.681                        | 1.063                        | 3.639                        |
| <i>Hbegf</i>       | heparin-binding EGF-like growth factor                                  | Mm.289681        | 1                                                 | 1.086                        | 0.901                        | 3.600                        |
| <i>Fosl1</i>       | fos-like antigen 1                                                      | Mm.6215          | 1                                                 | 1.139                        | 1.177                        | 3.595                        |
| <i>Trim2</i>       | tripartite motif-containing 2                                           | Mm.44876         | 1                                                 | 1.371                        | 1.152                        | 3.511                        |
| <i>Tsc22d1</i>     | TSC22 domain family, member 1                                           | Mm.153272        | 1                                                 | 1.223                        | 1.028                        | 3.501                        |
| <i>Prom1</i>       | prominin 1                                                              | Mm.6250          | 1                                                 | 0.840                        | 0.719                        | 3.460                        |
| <i>Cldn3</i>       | claudin 3                                                               | Mm.158662        | 1                                                 | 1.208                        | 1.139                        | 3.337                        |
| <i>Upp1</i>        | uridine phosphorylase 1                                                 | Mm.4610          | 1                                                 | 1.251                        | 1.087                        | 3.214                        |
| <i>Lif</i>         | leukemia inhibitory factor                                              | Mm.4964          | 1                                                 | 1.119                        | 1.132                        | 3.198                        |
| <i>Itga3</i>       | integrin alpha 3                                                        | Mm.57035         | 1                                                 | 1.193                        | 1.209                        | 3.133                        |
| <i>Plod2</i>       | procollagen lysine, 2-oxoglutarate 5-dioxygenase 2                      | Mm.79983         | 1                                                 | 0.604                        | 0.892                        | 3.102                        |
| <i>Procr</i>       | protein C receptor, endothelial                                         | Mm.3243          | 1                                                 | 0.563                        | 0.908                        | 3.079                        |
| <i>Cd44</i>        | CD44 antigen                                                            | Mm.423621        | 1                                                 | 1.030                        | 0.990                        | 3.044                        |
| <i>Depdc6</i>      | DEP domain containing 6                                                 | Mm.295397        | 1                                                 | 0.871                        | 0.984                        | 3.012                        |
| <i>Tyrp1</i>       | tyrosinase-related protein 1                                            | Mm.30438         | 1                                                 | 1.124                        | 1.385                        | 2.956                        |
| <i>Akap12</i>      | A kinase (PRKA) anchor protein (gravin) 12                              | Mm.27481         | 1                                                 | 0.959                        | 0.992                        | 2.947                        |
| <i>Homer2</i>      | homer homolog 2 (Drosophila)                                            | Mm.228           | 1                                                 | 1.038                        | 0.890                        | 2.922                        |
| <i>Il1a</i>        | interleukin 1 alpha                                                     | Mm.15534         | 1                                                 | 1.145                        | 1.043                        | 2.906                        |
| <i>Angptl2</i>     | angiopoietin-like 2                                                     | Mm.208919        | 1                                                 | 1.243                        | 1.311                        | 2.899                        |
| <i>Tubb2a</i>      | tubulin, beta 2A                                                        | Mm.469917        | 1                                                 | 1.098                        | 1.269                        | 2.836                        |
| <i>Zfand2a</i>     | zinc finger, AN1-type domain 2A                                         | Mm.24521         | 1                                                 | 1.320                        | 1.189                        | 2.819                        |
| <i>Mid1ip1</i>     | Mid1 interacting protein 1 (gastrulation specific G12-like (zebrafish)) | Mm.29429         | 1                                                 | 1.319                        | 1.043                        | 2.767                        |
| <i>Mdm2</i>        | transformed mouse 3T3 cell double minute 2                              | Mm.22670         | 1                                                 | 1.027                        | 0.933                        | 2.719                        |
| <i>Etv4</i>        | ets variant gene 4 (E1A enhancer binding protein, E1AF)                 | Mm.5025          | 1                                                 | 1.138                        | 1.083                        | 2.701                        |
| <i>Tm4sf1</i>      | transmembrane 4 superfamily member 1                                    | Mm.856           | 1                                                 | 0.794                        | 0.763                        | 2.668                        |
| <i>Dusp7</i>       | dual specificity phosphatase 7                                          | Mm.275584        | 1                                                 | 1.152                        | 1.047                        | 2.624                        |
| <i>Epha2</i>       | Eph receptor A2                                                         | Mm.2581          | 1                                                 | 0.998                        | 0.907                        | 2.576                        |
| <i>Igf1bp7</i>     | insulin-like growth factor binding protein 7                            | Mm.233470        | 1                                                 | 0.991                        | 0.954                        | 2.576                        |
| <i>Bid</i>         | BH3 interacting domain death agonist                                    | Mm.235081        | 1                                                 | 1.175                        | 1.039                        | 2.537                        |
| <i>Psca</i>        | prostate stem cell antigen                                              | Mm.46395         | 1                                                 | 0.780                        | 0.783                        | 2.524                        |
| <i>Ikbke</i>       | inhibitor of kappaB kinase epsilon                                      | Mm.386783        | 1                                                 | 0.965                        | 1.041                        | 2.524                        |
| <i>Gjb3</i>        | gap junction protein, beta 3                                            | Mm.90003         | 1                                                 | 0.917                        | 0.962                        | 2.488                        |
| <i>Bcl2l15</i>     | BCL2-like 15                                                            | Mm.297245        | 1                                                 | 1.100                        | 0.900                        | 2.473                        |
| <i>Lipg</i>        | lipase, endothelial                                                     | Mm.299647        | 1                                                 | 1.196                        | 0.888                        | 2.402                        |
| <i>Ddit4l</i>      | DNA-damage-inducible transcript 4-like                                  | Mm.250841        | 1                                                 | 0.821                        | 0.955                        | 2.399                        |

**Table S1. Cont.**

| Up-regulated genes |                                                          |                  | Fold (compared with f/f, Cre <sup>-</sup> + EtOH) |                              |                              |                              |
|--------------------|----------------------------------------------------------|------------------|---------------------------------------------------|------------------------------|------------------------------|------------------------------|
| Gene symbol        | Gene name                                                | Unigene (Avadis) | f/f, Cre <sup>-</sup> + EtOH                      | f/f, Cre <sup>-</sup> + 4OHT | f/f, Cre <sup>+</sup> + EtOH | f/f, Cre <sup>+</sup> + 4OHT |
| <i>Prl8a9</i>      | prolactin family8, subfamily a, member 9                 | Mm.46091         | 1                                                 | 0.786                        | 1.146                        | 2.359                        |
| <i>Cd55</i>        | CD55 antigen                                             | Mm.101591        | 1                                                 | 0.814                        | 0.837                        | 2.347                        |
| <i>Cgref1</i>      | cell growth regulator with EF hand domain 1              | Mm.45127         | 1                                                 | 0.675                        | 0.708                        | 2.320                        |
| <i>Rin1</i>        | Ras and Rab interactor 1                                 | Mm.271922        | 1                                                 | 0.862                        | 0.996                        | 2.253                        |
| <i>Krt18</i>       | keratin 18                                               | Mm.22479         | 1                                                 | 0.805                        | 0.797                        | 2.237                        |
| <i>Gapdhs</i>      | glyceraldehyde-3-phosphate dehydrogenase, spermatogenic  | Mm.436562        | 1                                                 | 0.953                        | 0.895                        | 2.228                        |
| <i>Pdpn</i>        | podoplanin                                               | Mm.2976          | 1                                                 | 0.630                        | 0.809                        | 2.202                        |
| <i>Tfrc</i>        | transferrin receptor                                     | Mm.28683         | 1                                                 | 1.007                        | 0.978                        | 2.170                        |
| <i>Arhgef3</i>     | Rho guanine nucleotide exchange factor (GEF) 3           | Mm.248606        | 1                                                 | 0.899                        | 0.899                        | 2.159                        |
| <i>Acaa1b</i>      | acetyl-Coenzyme A acyltransferase 1B                     | Mm.379402        | 1                                                 | 0.724                        | 0.866                        | 2.148                        |
| <i>Has3</i>        | hyaluronan synthase 3                                    | Mm.56986         | 1                                                 | 0.925                        | 0.782                        | 2.137                        |
| <i>Dhh</i>         | desert hedgehog                                          | Mm.384073        | 1                                                 | 0.573                        | 0.697                        | 2.127                        |
| <i>Ccnd1</i>       | cyclin D1                                                | Mm.273049        | 1                                                 | 0.618                        | 0.859                        | 2.084                        |
| <i>Rapgef3</i>     | Rap guanine nucleotide exchange factor (GEF) 3           | Mm.24028         | 1                                                 | 0.878                        | 0.750                        | 2.064                        |
| <i>Pigf</i>        | phosphatidylinositol glycan anchor biosynthesis, class F | Mm.219685        | 1                                                 | 0.671                        | 0.983                        | 2.031                        |
| <i>Pdpn</i>        | podoplanin                                               | Mm.2976          | 1                                                 | 0.630                        | 0.809                        | 2.202                        |
| <i>Tfrc</i>        | transferrin receptor                                     | Mm.28683         | 1                                                 | 1.007                        | 0.978                        | 2.170                        |
| <i>Arhgef3</i>     | Rho guanine nucleotide exchange factor (GEF) 3           | Mm.248606        | 1                                                 | 0.899                        | 0.899                        | 2.159                        |
| <i>Acaa1b</i>      | acetyl-Coenzyme A acyltransferase 1B                     | Mm.379402        | 1                                                 | 0.724                        | 0.866                        | 2.148                        |
| <i>Has3</i>        | hyaluronan synthase 3                                    | Mm.56986         | 1                                                 | 0.925                        | 0.782                        | 2.137                        |
| <i>Dhh</i>         | desert hedgehog                                          | Mm.384073        | 1                                                 | 0.573                        | 0.697                        | 2.127                        |
| <i>Ccnd1</i>       | cyclin D1                                                | Mm.273049        | 1                                                 | 0.618                        | 0.859                        | 2.084                        |
| <i>Rapgef3</i>     | Rap guanine nucleotide exchange factor (GEF) 3           | Mm.24028         | 1                                                 | 0.878                        | 0.750                        | 2.064                        |
| <i>Pigf</i>        | phosphatidylinositol glycan anchor biosynthesis, class F | Mm.219685        | 1                                                 | 0.671                        | 0.983                        | 2.031                        |

**Table S2. Genes with more than twofold down-regulation in microarray analyses in comparing f/f, Cre<sup>+</sup> + 4OHT with f/f, Cre<sup>-</sup> + EtOH groups**

| Down-regulated genes |                                                 |                  | Fold (compared with f/f, Cre <sup>-</sup> + EtOH) |                              |                              |                              |
|----------------------|-------------------------------------------------|------------------|---------------------------------------------------|------------------------------|------------------------------|------------------------------|
| Gene symbol          | Gene name                                       | Unigene (Avadis) | f/f, Cre <sup>-</sup> + EtOH                      | f/f, Cre <sup>-</sup> + 4OHT | f/f, Cre <sup>+</sup> + EtOH | f/f, Cre <sup>+</sup> + 4OHT |
| <i>Rptn</i>          | repetin                                         | Mm.1417          | 1                                                 | 0.300                        | 0.980                        | 13.976                       |
| <i>Chdh</i>          | choline dehydrogenase                           | Mm.259916        | 1                                                 | 1.204                        | 0.929                        | 7.545                        |
| <i>Matn2</i>         | matrilin 2                                      | Mm.396856        | 1                                                 | 1.157                        | 0.981                        | 7.464                        |
| <i>Figf</i>          | c-fos induced growth factor                     | Mm.297978        | 1                                                 | 1.346                        | 1.035                        | 6.688                        |
| <i>Lce1f</i>         | late cornified envelope 1F                      | Mm.158176        | 1                                                 | 0.517                        | 1.230                        | 6.478                        |
| <i>Krt1</i>          | keratin 1                                       | Mm.183137        | 1                                                 | 0.553                        | 0.665                        | 6.243                        |
| <i>Lce1d</i>         | late cornified envelope 1D                      | Mm.176243        | 1                                                 | 0.346                        | 1                            | 5.978                        |
| <i>Fgf13</i>         | fibroblast growth factor 13                     | Mm.7995          | 1                                                 | 1.259                        | 1.031                        | 4.860                        |
| <i>Col4a1</i>        | collagen, type IV, alpha 1                      | Mm.738           | 1                                                 | 1.337                        | 1.267                        | 4.724                        |
| <i>Pcdh21</i>        | protocadherin 21                                | Mm.156506        | 1                                                 | 1.588                        | 1.100                        | 4.693                        |
| <i>Lgals9</i>        | lectin, galactose binding, soluble 9            | Mm.341434        | 1                                                 | 0.972                        | 0.888                        | 4.583                        |
| <i>Tgfb1</i>         | transforming growth factor, beta induced        | Mm.14455         | 1                                                 | 1.471                        | 0.994                        | 4.552                        |
| <i>Vav3</i>          | vav 3 oncogene                                  | Mm.282257        | 1                                                 | 1.024                        | 0.901                        | 4.423                        |
| <i>Rbbp8</i>         | retinoblastoma binding protein 8                | Mm.154275        | 1                                                 | 1.415                        | 1.230                        | 4.115                        |
| <i>Igfbp3</i>        | insulin-like growth factor binding protein 3    | Mm.29254         | 1                                                 | 0.500                        | 0.593                        | 3.989                        |
| <i>Igfbp4</i>        | insulin-like growth factor binding protein 4    | Mm.233799        | 1                                                 | 1.617                        | 1.002                        | 3.858                        |
| <i>Dbp</i>           | D site albumin promoter binding protein         | Mm.378235        | 1                                                 | 1.277                        | 1.215                        | 3.745                        |
| <i>Amot</i>          | angiominin                                      | Mm.100068        | 1                                                 | 1.184                        | 1.044                        | 3.586                        |
| <i>Lce1a2</i>        | late cornified envelope 1A2                     | Mm.279773        | 1                                                 | 0.414                        | 1.280                        | 3.577                        |
| <i>Irx4</i>          | Iroquois related homeobox 4 (Drosophila)        | Mm.103784        | 1                                                 | 1.374                        | 0.775                        | 3.482                        |
| <i>Fxyd6</i>         | FXD domain-containing ion transport regulator 6 | Mm.208287        | 1                                                 | 0.940                        | 0.949                        | 3.478                        |
| <i>Pthlh</i>         | parathyroid hormone-like peptide                | Mm.28440         | 1                                                 | 0.660                        | 0.859                        | 3.417                        |
| <i>Lce1i</i>         | late cornified envelope 1I                      | Mm.291782        | 1                                                 | 0.461                        | 1.093                        | 3.270                        |
| <i>Vldlr</i>         | very low density lipoprotein receptor           | Mm.4141          | 1                                                 | 1.508                        | 1.332                        | 3.227                        |

Table S2. Cont.

| Down-regulated genes |                                                                                                |                  | Fold (compared with f/f, Cre <sup>-</sup> + EtOH) |                              |                              |                              |
|----------------------|------------------------------------------------------------------------------------------------|------------------|---------------------------------------------------|------------------------------|------------------------------|------------------------------|
| Gene symbol          | Gene name                                                                                      | Unigene (Avadis) | f/f, Cre <sup>-</sup> + EtOH                      | f/f, Cre <sup>-</sup> + 4OHT | f/f, Cre <sup>+</sup> + EtOH | f/f, Cre <sup>+</sup> + 4OHT |
| <i>Prdm1</i>         | PR domain containing 1, with ZNF domain                                                        | Mm.4800          | 1                                                 | 0.395                        | 1.219                        | 3.218                        |
| <i>Fhl1</i>          | four and a half LIM domains 1                                                                  | Mm.3126          | 1                                                 | 1.210                        | 1.237                        | 3.188                        |
| <i>Ear5</i>          | eosinophil-associated, ribonuclease A family, member 5                                         | Mm.377125        | 1                                                 | 0.170                        | 1.328                        | 3.179                        |
| <i>Stbd1</i>         | starch binding domain 1                                                                        | Mm.21965         | 1                                                 | 1.428                        | 1.088                        | 3.090                        |
| <i>Sostdc1</i>       | sclerostin domain containing 1                                                                 | Mm.43375         | 1                                                 | 1.039                        | 1.135                        | 3.060                        |
| <i>Lce3a</i>         | late cornified envelope 3A                                                                     | Mm.387664        | 1                                                 | 0.551                        | 1.468                        | 3.036                        |
| <i>Hrnr</i>          | hornerin                                                                                       | Mm.208047        | 1                                                 | 0.350                        | 1.113                        | 3.003                        |
| <i>Antxr1</i>        | anthrax toxin receptor 1                                                                       | Mm.232525        | 1                                                 | 1.137                        | 1.054                        | 2.955                        |
| <i>Adh7</i>          | alcohol dehydrogenase 7 (class IV), mu or sigma polypeptide                                    | Mm.8473          | 1                                                 | 1.189                        | 1.164                        | 2.906                        |
| <i>Cyp2s1</i>        | cytochrome P450, family 2, subfamily s, polypeptide 1                                          | Mm.275188        | 1                                                 | 0.804                        | 0.861                        | 2.886                        |
| <i>Fgfr3</i>         | fibroblast growth factor receptor 3                                                            | Mm.6904          | 1                                                 | 1.210                        | 1.075                        | 2.853                        |
| <i>Serpinb1a</i>     | serine (or cysteine) peptidase inhibitor, clade B, member 1a                                   | Mm.20144         | 1                                                 | 0.686                        | 0.767                        | 2.844                        |
| <i>Eppk1</i>         | epiplakin 1                                                                                    | Mm.259929        | 1                                                 | 1.021                        | 1.313                        | 2.839                        |
| <i>Lce1b</i>         | late cornified envelope 1B                                                                     | Mm.291769        | 1                                                 | 0.384                        | 1.154                        | 2.838                        |
| <i>Psmb8</i>         | proteasome (prosome, macropain) subunit, beta type 8 (large multifunctional peptidase 7)       | Mm.180191        | 1                                                 | 0.788                        | 0.954                        | 2.832                        |
| <i>Pygl</i>          | liver glycogen phosphorylase                                                                   | Mm.256926        | 1                                                 | 0.991                        | 0.882                        | 2.810                        |
| <i>Col5a2</i>        | collagen, type V, alpha 2                                                                      | Mm.10299         | 1                                                 | 1.303                        | 1.288                        | 2.804                        |
| <i>Acss2</i>         | acyl-CoA synthetase short-chain family member 2                                                | Mm.255026        | 1                                                 | 1.200                        | 1.096                        | 2.790                        |
| <i>Mmp2</i>          | matrix metalloproteinase 2                                                                     | Mm.29564         | 1                                                 | 1.176                        | 1.113                        | 2.743                        |
| <i>Steap4</i>        | STEAP family member 4                                                                          | Mm.31403         | 1                                                 | 0.857                        | 0.671                        | 2.729                        |
| <i>Oplah</i>         | 5-oxoprolinase (ATP-hydrolysing)                                                               | Mm.322738        | 1                                                 | 0.785                        | 0.816                        | 2.729                        |
| <i>Cyp39a1</i>       | cytochrome P450, family 39, subfamily a, polypeptide 1                                         | Mm.376968        | 1                                                 | 1.133                        | 0.929                        | 2.722                        |
| <i>Phyh</i>          | phytanoyl-CoA hydroxylase                                                                      | Mm.391704        | 1                                                 | 0.787                        | 0.742                        | 2.700                        |
| <i>Agrp</i>          | agouti related protein                                                                         | Mm.441696        | 1                                                 | 0.655                        | 1.008                        | 2.625                        |
| <i>Ctnnal1</i>       | catenin (cadherin associated protein), alpha-like 1                                            | Mm.218891        | 1                                                 | 1.044                        | 0.765                        | 2.621                        |
| <i>Ahcy12</i>        | S-adenosylhomocysteine hydrolase-like 2                                                        | Mm.210899        | 1                                                 | 1.165                        | 0.931                        | 2.596                        |
| <i>Rgn</i>           | regucalcin                                                                                     | Mm.2118          | 1                                                 | 0.950                        | 1.062                        | 2.591                        |
| <i>Osmr</i>          | oncostatin M receptor                                                                          | Mm.10760         | 1                                                 | 1.070                        | 1.099                        | 2.548                        |
| <i>Il13ra1</i>       | interleukin 13 receptor, alpha 1                                                               | Mm.24208         | 1                                                 | 0.854                        | 0.795                        | 2.537                        |
| <i>Ctsc</i>          | cathepsin C                                                                                    | Mm.322945        | 1                                                 | 0.980                        | 0.943                        | 2.533                        |
| <i>Socs3</i>         | suppressor of cytokine signaling 3                                                             | Mm.3468          | 1                                                 | 1.251                        | 1.229                        | 2.514                        |
| <i>Cyp1b1</i>        | cytochrome P450, family 1, subfamily b, polypeptide 1                                          | Mm.214016        | 1                                                 | 0.630                        | 0.928                        | 2.478                        |
| <i>Gas1</i>          | growth arrest specific 1                                                                       | Mm.22701         | 1                                                 | 1.171                        | 0.861                        | 2.470                        |
| <i>Il6st</i>         | interleukin 6 signal transducer                                                                | Mm.4364          | 1                                                 | 0.911                        | 0.865                        | 2.438                        |
| <i>Hfe</i>           | hemochromatosis                                                                                | Mm.2681          | 1                                                 | 1.092                        | 1.083                        | 2.433                        |
| <i>Prkcdp</i>        | protein kinase C, delta binding protein                                                        | Mm.3124          | 1                                                 | 0.792                        | 0.841                        | 2.430                        |
| <i>Flot1</i>         | flotillin 1                                                                                    | Mm.2931          | 1                                                 | 0.897                        | 0.950                        | 2.418                        |
| <i>Lce1h</i>         | late cornified envelope 1H                                                                     | Mm.23784         | 1                                                 | 0.485                        | 1.061                        | 2.410                        |
| <i>Saa3</i>          | serum amyloid A 3                                                                              | Mm.14277         | 1                                                 | 0.305                        | 0.369                        | 2.398                        |
| <i>Sord</i>          | sorbitol dehydrogenase                                                                         | Mm.371580        | 1                                                 | 0.945                        | 0.920                        | 2.396                        |
| <i>Atp1a1</i>        | ATPase, Na <sup>+</sup> /K <sup>+</sup> transporting, alpha 1 polypeptide                      | Mm.280103        | 1                                                 | 1.009                        | 0.881                        | 2.388                        |
| <i>Zfp238</i>        | zinc finger protein 238                                                                        | Mm.330700        | 1                                                 | 1.104                        | 0.937                        | 2.380                        |
| <i>Mgst1</i>         | microsomal glutathione S-transferase 1                                                         | Mm.14796         | 1                                                 | 0.921                        | 0.805                        | 2.371                        |
| <i>Gata3</i>         | GATA binding protein 3                                                                         | Mm.313866        | 1                                                 | 1.175                        | 1.127                        | 2.369                        |
| <i>Clybl</i>         | citrate lyase beta like                                                                        | Mm.34608         | 1                                                 | 1.141                        | 1.070                        | 2.326                        |
| <i>Tbx1</i>          | T-box 1                                                                                        | Mm.295194        | 1                                                 | 0.753                        | 0.912                        | 2.325                        |
| <i>Lpo</i>           | lactoperoxidase                                                                                | Mm.41236         | 1                                                 | 0.488                        | 0.951                        | 2.313                        |
| <i>Idh1</i>          | isocitrate dehydrogenase 1 (NADP <sup>+</sup> ), soluble                                       | Mm.9925          | 1                                                 | 0.895                        | 0.918                        | 2.306                        |
| <i>Fzd6</i>          | frizzled homolog 6 (Drosophila)                                                                | Mm.4769          | 1                                                 | 1.062                        | 0.883                        | 2.292                        |
| <i>Gstm1</i>         | glutathione S-transferase, mu 1                                                                | Mm.37199         | 1                                                 | 1.060                        | 1.083                        | 2.245                        |
| <i>Glul</i>          | glutamate-ammonia ligase (glutamine synthetase)                                                | Mm.210745        | 1                                                 | 1.016                        | 0.747                        | 2.211                        |
| <i>Cyp4b1</i>        | cytochrome P450, family 4, subfamily b, polypeptide 1                                          | Mm.1840          | 1                                                 | 0.715                        | 0.746                        | 2.202                        |
| <i>Adamts1</i>       | a disintegrin-like and metalloproteinase (reprolysin type) with thrombospondin type 1 motif, 1 | Mm.1421          | 1                                                 | 1.071                        | 1.028                        | 2.188                        |
| <i>Maoa</i>          | monoamine oxidase A                                                                            | Mm.21108         | 1                                                 | 0.958                        | 1.050                        | 2.183                        |
| <i>Plxdc1</i>        | plexin domain containing 1                                                                     | Mm.39617         | 1                                                 | 0.947                        | 0.907                        | 2.173                        |
